# Supplementary material for: pH-Dependent membrane lysis by using melittin-inspired designed peptides
Source: Royal Society of Chemistry journal article supplement (doi:10.1039/c6ob01002d), 2016-01-01
Supplement: c6ob01002d1.pdf [file c6ob01002d1.pdf]

## ***Supporting Information***

### **pH-Dependent Membrane Lysis by Melittin-Inspired Designed Peptides**

Ayumi Kashiwada\*, Masaki Mizuno, and Jun-ichi Hashimoto

Department of Applied Molecular Chemistry, Graduate School of Industrial Technology, Nihon University, Narashino, Chiba 275-8575, Japan

E-mail: kashiwada.ayumi@nihon-u.ac.jp

#### **Contents:**

- **Identification of designed membrane-lytic peptides**
- **Characterization of membrane lytic properties of LP**
- **Characterization of pH-selective (or -responsive) membrane lytic properties of designed peptide, LPE3-1**

# Identification of designed membrane-lytic peptides

All products were identified by HPLC and high resolution mass analyses. Analytical HPLC chromatograms of peptides were obtained at 280 nm from a gradient of 20% to 80% (eluent B) over 30 min on an Inertsil ODS-3 column, 5  $\mu$ m, 250 mm  $\times$  4.6 mm i.d., GL-science, Japan; eluent A: water / 0.1% TFA, eluent B: acetonitrile / 0.1% TFA; flow rate 1.0 ml/min. Mass spectra were recorded on the Agilent 6210 ESI-TOF mass spectrometer (Agilent Technologies, Santa Clara, CA, USA). The samples were dissolved in acetonitrile/water (1/1) containing 0.1% TFA and injected directly into the spray chamber by using a syringe pump with flowrates of 10 to 50  $\mu$ l/min. The spray voltage was 4000 V and flow rate of the drying N<sub>2</sub> gas was set to 1 psi.

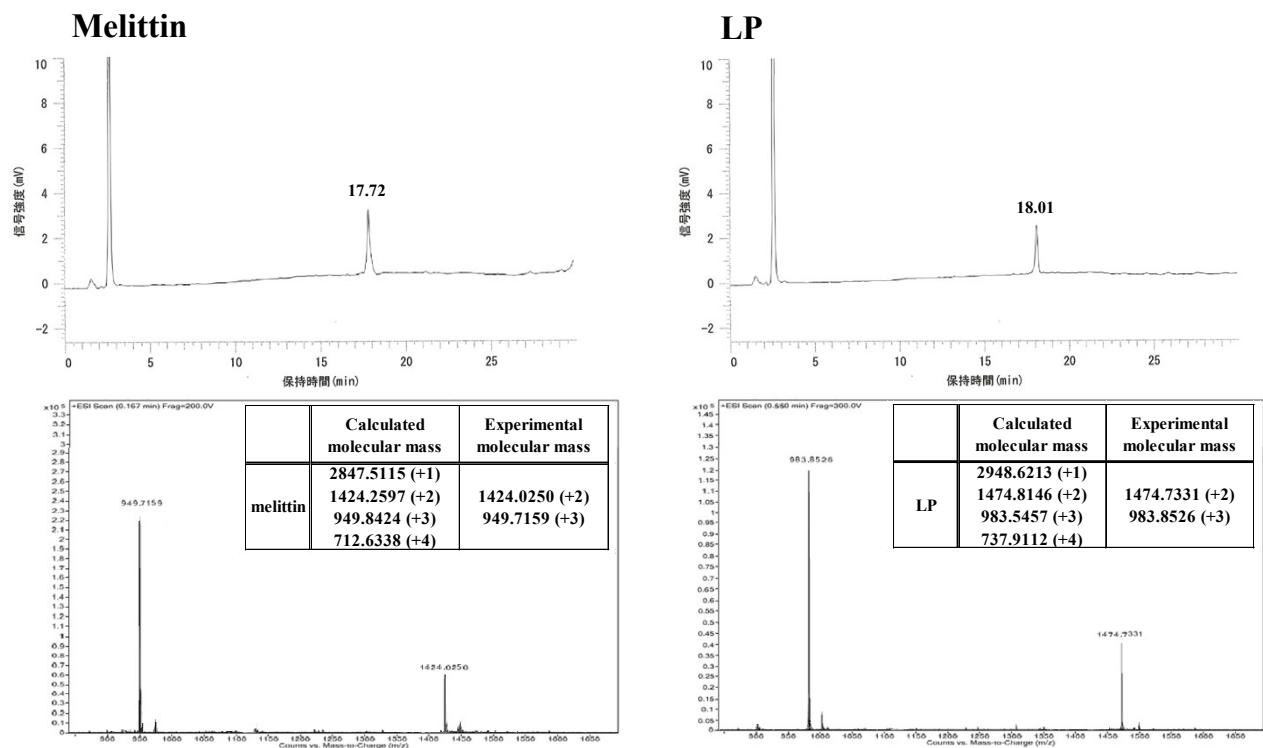

**Fig. S1** Analytical HPLC chromatograms and mass spectra of melittin and a typical membrane-lytic peptide (LP).

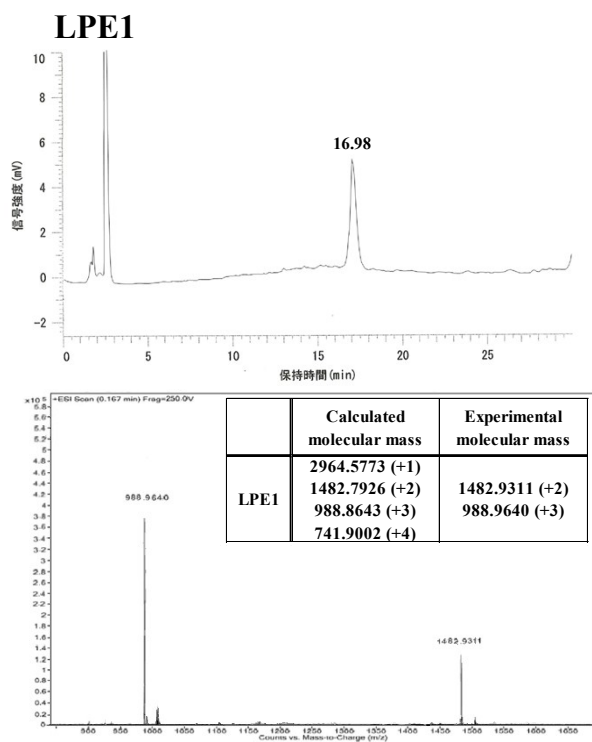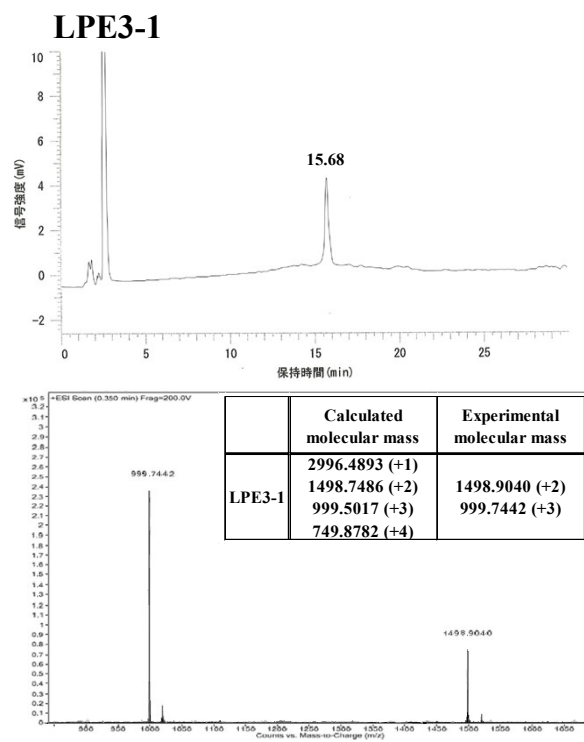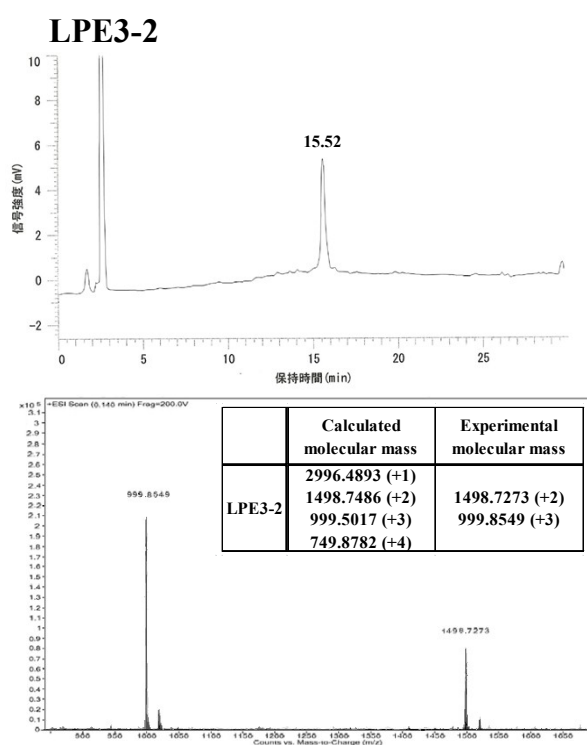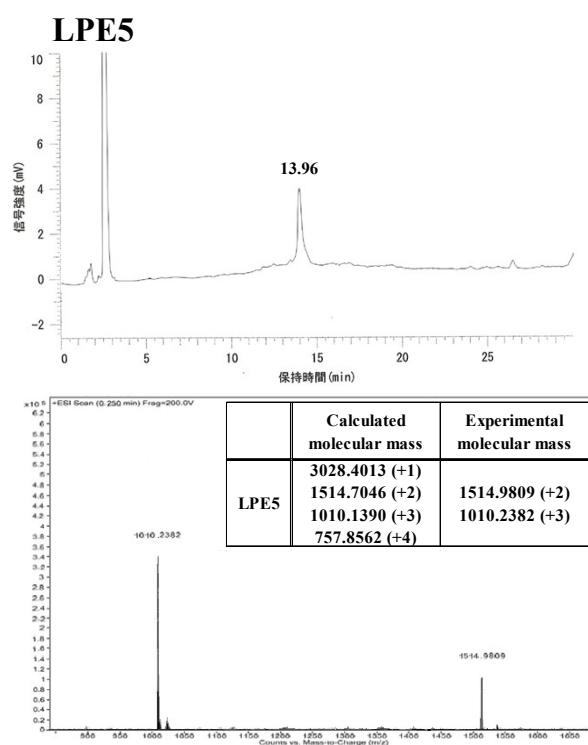

**Fig. S2** Analytical HPLC chromatograms and mass spectra of the designed weakly acidic pH-selective lytic peptides mutated at the hydrophobic helical segment (LPE series).

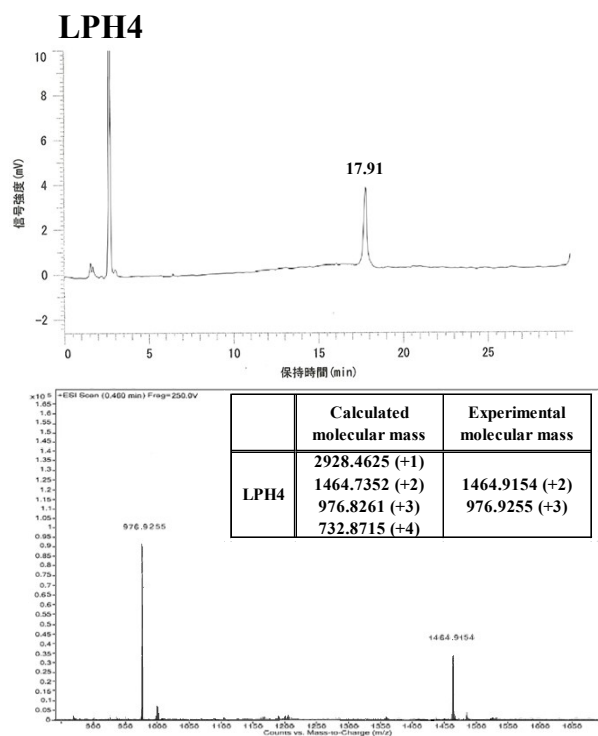

**Fig. S3** Analytical HPLC chromatogram and mass spectrum of LPH4 replaced cationic arginine and lysine residues with histidine.

## Characterization of membrane lytic properties of LP

### Characterization of pH-dependence of membrane lytic activity of LP

Membrane lytic properties of LP were characterized by calcein-leakage assay as same procedures written in “Experimental Section”.

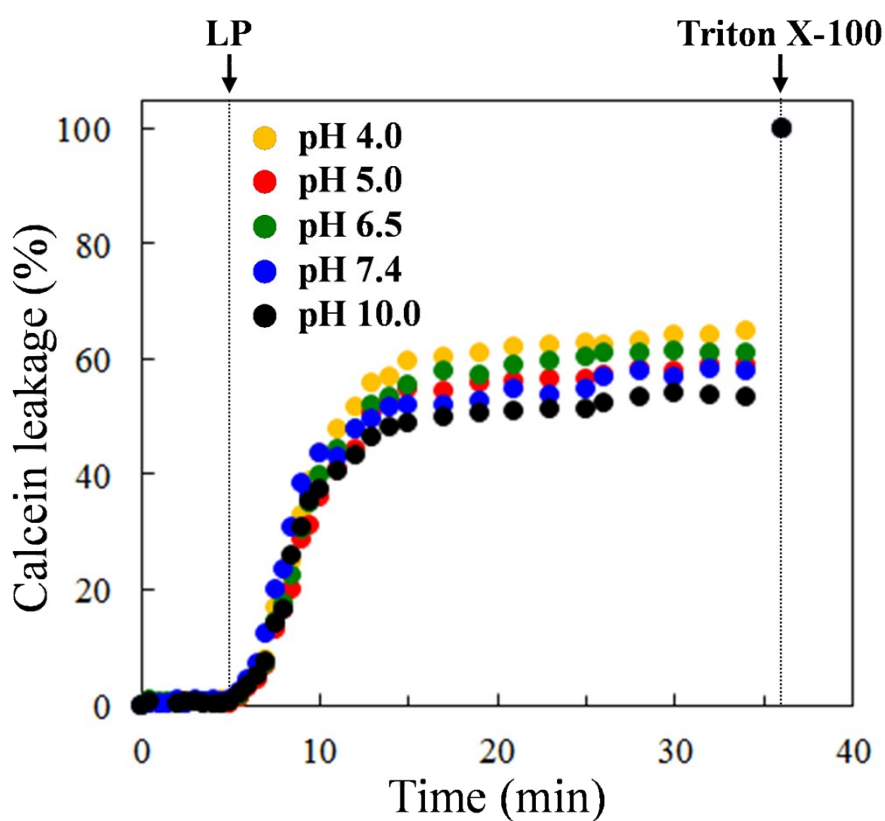

**Fig. S4** Membrane lytic activities of LP in the range of pH 4.0 to pH 10.0. Calcein leakage from EggPC liposomes was measured every 30 or 60 s a following the addition of 20  $\mu$ M of LP at 25  $^{\circ}$ C.

### Characterization of contribution of electrostatic interactions at the surface of the liposomes to membrane lytic activity of LP

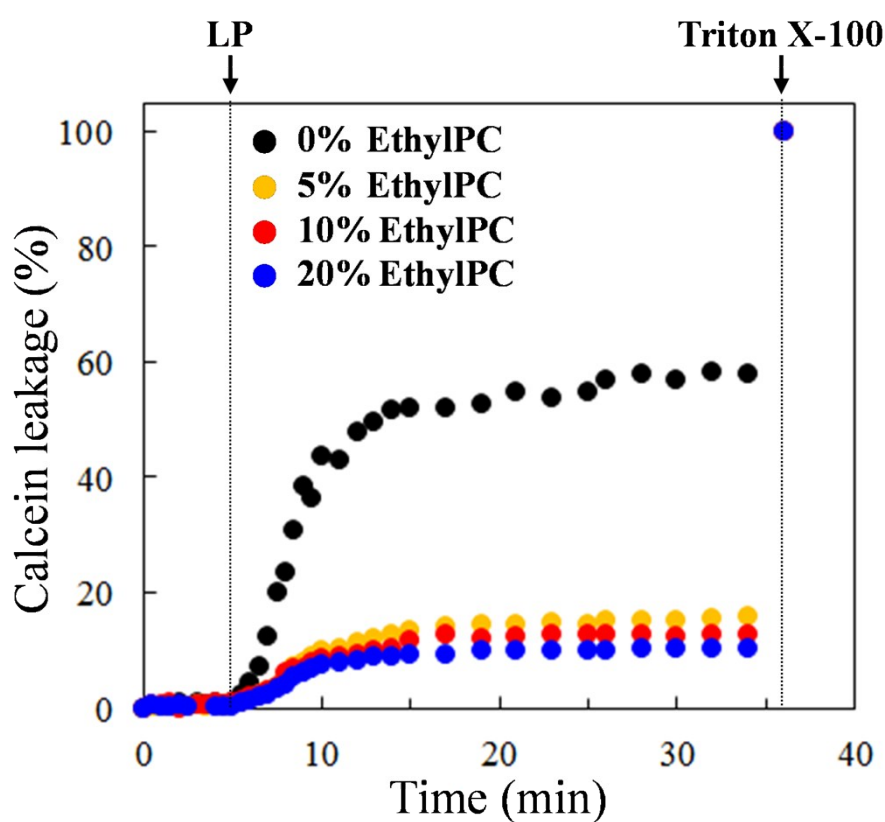

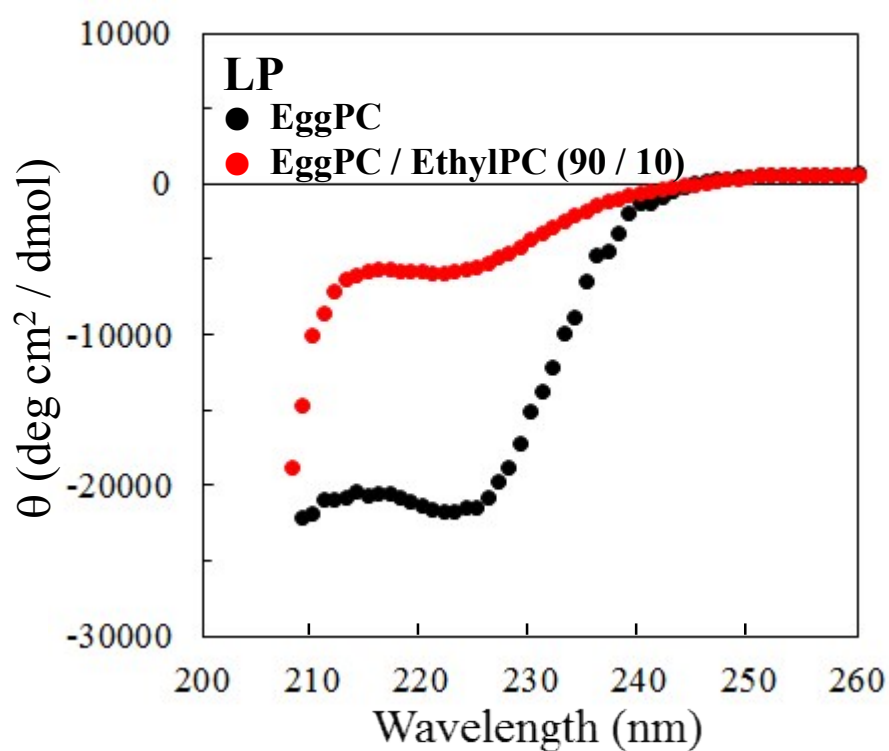

**Fig. S6** Circular dichroism spectra of LP in the presence of EggPC and cationic charged (EggPC/EthylPC = 90/10) liposomes at pH 7.4. These spectra were taken for solutions of 20  $\mu$ M LP in the presence of 2.0 mM lipids at 25  $^{\circ}$ C.

## Characterization of pH-selective (or -responsive) membrane lytic properties of designed peptide, LPE3-1

### Membrane-penetrating property of lytic peptides characterized by fluorescence spectroscopy

Membrane-penetrating properties of lytic peptides (LP and LPE3-1) were characterized by the fluorescence of the Trp residue as same procedures written in “Experimental Section”.

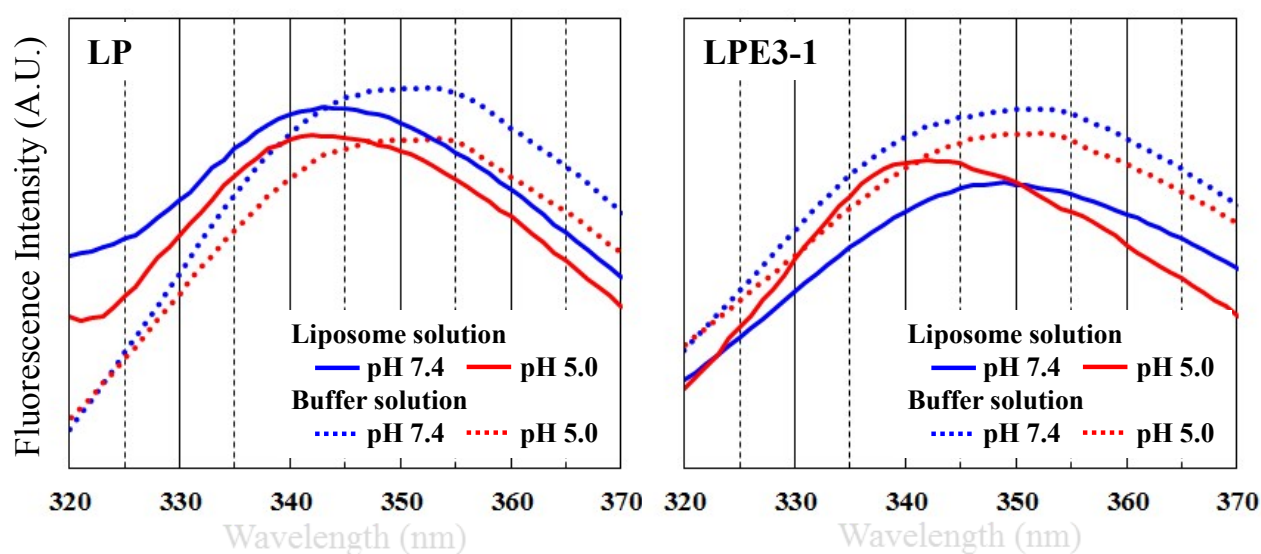

**Fig. S7** Fluorescence spectra of LP and LPE3-1 in the presence or absence of liposomes at pH 7.4 and pH 5.0. These spectra were taken for 20  $\mu$ M peptide solutions at 25  $^{\circ}$ C.



### Characterization of pH-responsive membrane lytic properties of LPE3-1 by membrane accessibility assay

Membrane lytic properties of LPE3-1 were characterized by membrane accessibility assay as same procedures written in “Experimental Section”.

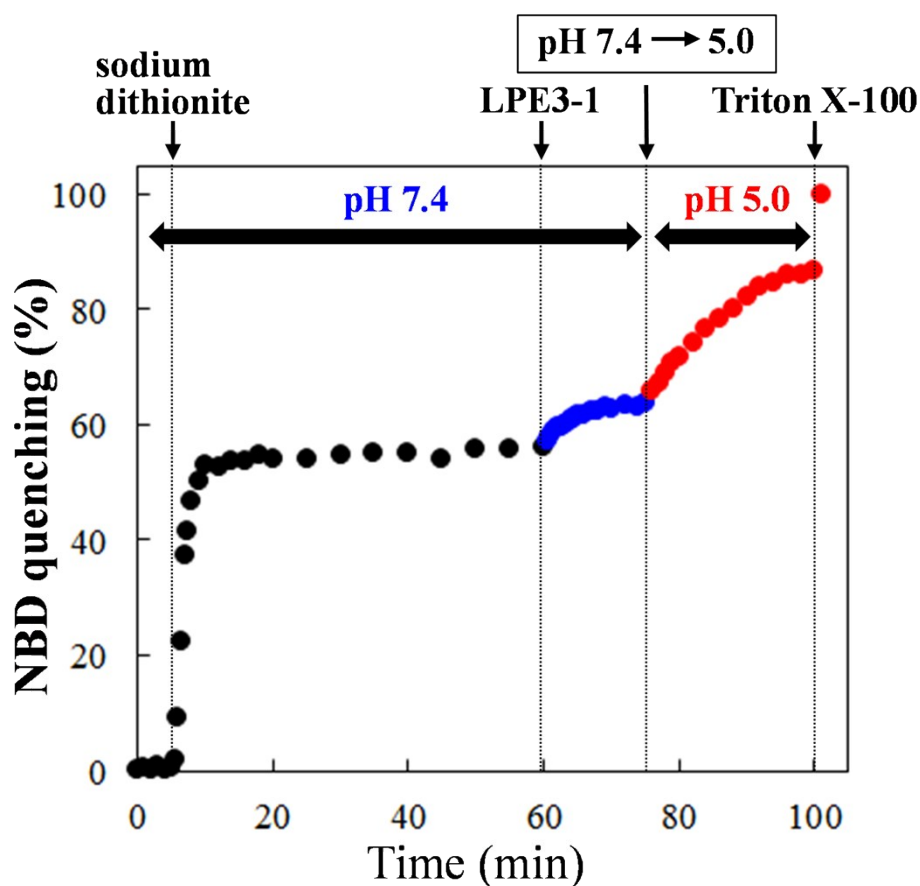

**Fig. S8** pH-activated membrane lysis of LPE3-1 characterized by the membrane accessibility assay. LPE3-1 was added to liposome (inner-leaflet of liposome was labeled by NBD) solution at pH 7.4. After 15 min incubation, the pH was lowered to a value of 5.0 by adding hydrochloric acid.

### Monitoring the liposome integrity during the membrane lytic process by LPE3-1

Size distribution of liposomes during membrane lytic process was characterized by the dynamic light scattering (DLS) measurements as same procedures written in “Experimental Section”.

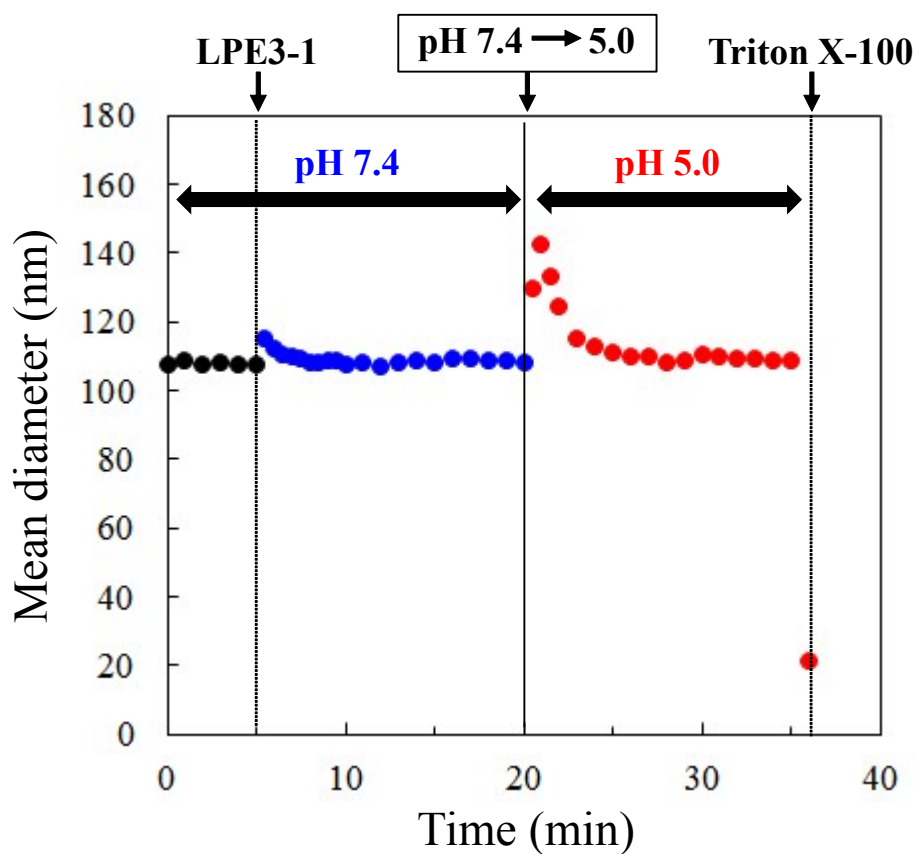

**Fig. S9** Mean diameter from DLS measurements during pH-activated membrane lytic process by LPE3-1. LPE3-1 was added to liposome solution at pH 7.4. After 15 min incubation, the pH was lowered to a value of 5.0 by adding hydrochloric acid.
